# Supplementary material
Source: publisher figshare collection journal article supplement (https://acs.figshare.com/ndownloader/files/14525117)
Supplement: Supplementary file 1 [file 14525117]

## Supporting Information

# Size-controlled Preparation of Micro-sized Perfluorocarbon Emulsions as Oxygen Carriers via SPG Membrane Emulsification Technique

Xiaoting Fu†, Seiichi Ohta‡, Masamichi Kamihira§, Yasuyuki Sakai†, Taichi Ito\*†‡

†Department of Bioengineering, The University of Tokyo, 7-3-1 Hongo, Bunkyo-ku,  
Tokyo 113-8656, Japan

‡Center for Disease Biology and Integrative Medicine, The University of Tokyo, 7-3-1  
Hongo, Bunkyo-ku, Tokyo 113-8655, Japan

§Department of Chemical Engineering, Kyushu University, 744 Motooka, Nishi-ku,  
Fukuoka 819-0395, Japan

\* E-mail: taichi@m.u-tokyo.ac.jp

| <b>Table of Contents:</b>  | <b>Page</b> |
|----------------------------|-------------|
| Figure S1.....             | S2          |
| Figure S2.....             | S3          |
| Figure S3.....             | S4          |
| Table S1 and Table S2..... | S5          |
| Figure S4.....             | S6          |
| Table S3 .....             | S7          |
| Figure S5.....             | S8          |
| Figure S6.....             | S9          |
| Figure S7.....             | S10         |
| Figure S8.....             | S11         |

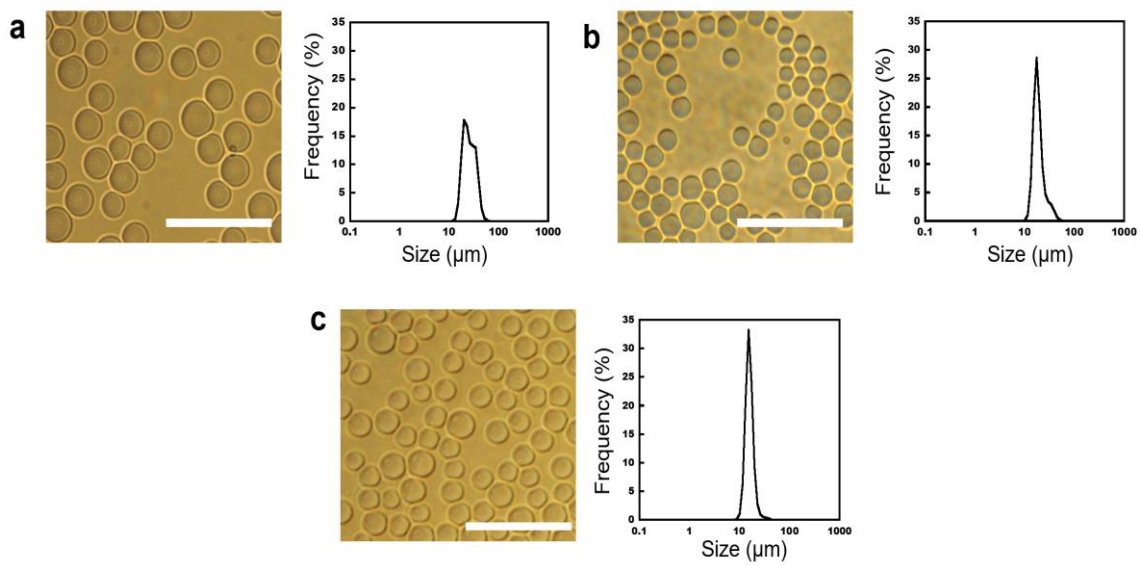

**Figure S1.** Optical pictures and size distributions of FDC emulsions prepared via SPG membrane with pore size of (a) 5  $\mu\text{m}$  (b) 4  $\mu\text{m}$  (c) 3  $\mu\text{m}$ . Scale bars: 50  $\mu\text{m}$

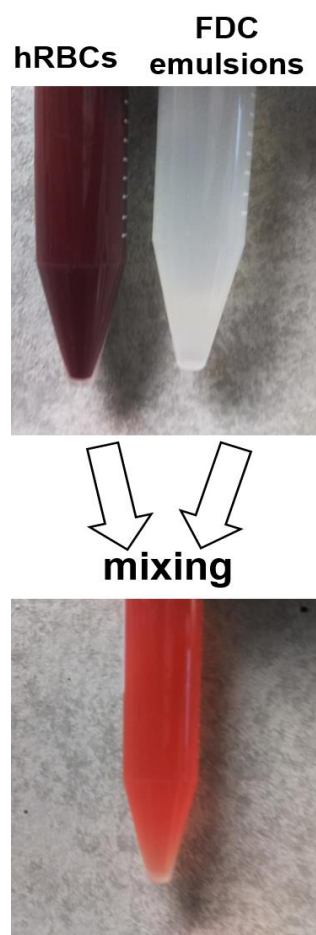

**Figure S2.** Mixing FDC emulsions with hRBCs

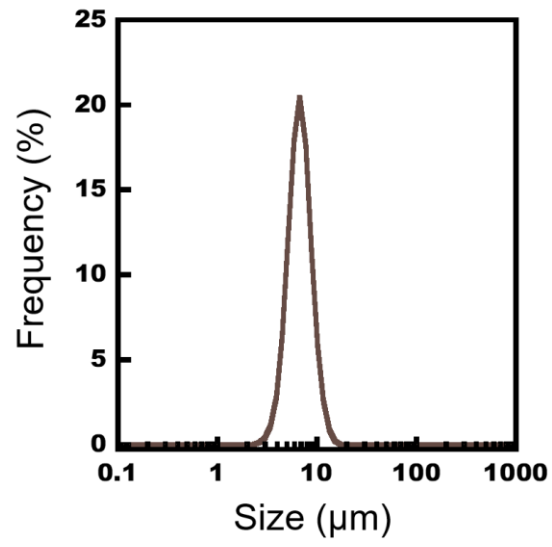

**Figure S3.** Size distribution of hRBCs measured using laser diffraction.

**Table S1** Statistical analysis for different Pluronics at certain concentration

| Subject   | <i>P</i> (0.2%) | <i>P</i> (2%) |
|-----------|-----------------|---------------|
| F127/P103 | 0.0003          | 0.1           |
| F68/P85   | 0.0002          | 0.7           |
| F127/F68  | 0.2             | <0.0001       |
| F127/P85  | <0.0001         | <0.0001       |
| F68/P103  | 0.0002          | <0.0001       |
| P85/P103  | 0.1             | <0.0001       |

**Table S2** Statistical analysis for certain Pluronics between different concentrations

| Pluronics | <i>P</i> |
|-----------|----------|
| F127      | <0.0001  |
| F68       | <0.0001  |
| P85       | 0.002    |
| P103      | <0.0001  |

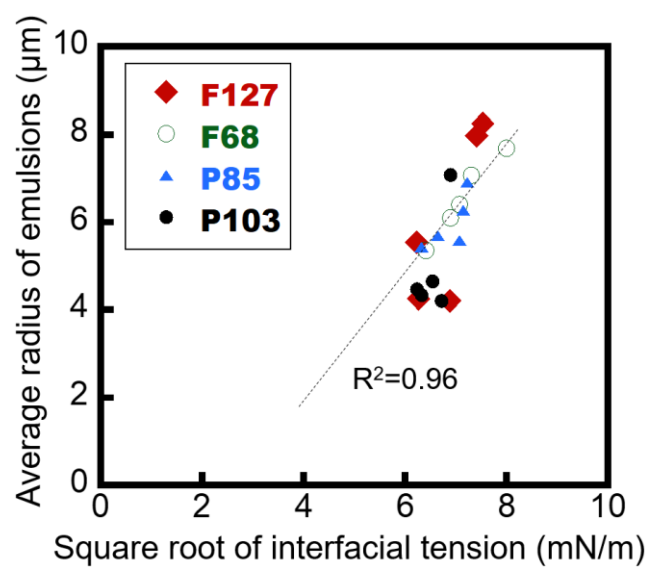

**Figure S4.** Relationship between the radius of emulsions and square root of the interfacial tension.

**Table S3** Critical pressures used to produce FDC emulsions with different Pluronics and their concentrations (kPa).

| Pluronic | Concentration of Pluronic in saline |      |    |    |    |
|----------|-------------------------------------|------|----|----|----|
|          | 0.2%                                | 0.5% | 1% | 2% | 3% |
| F127     | 50                                  | 50   | 49 | 39 | 37 |
| F68      | 51                                  | 50   | 50 | 46 | 48 |
| P85      | 29                                  | 24   | 25 | 21 | 17 |
| P103     | 20                                  | 24   | 21 | 24 | 18 |

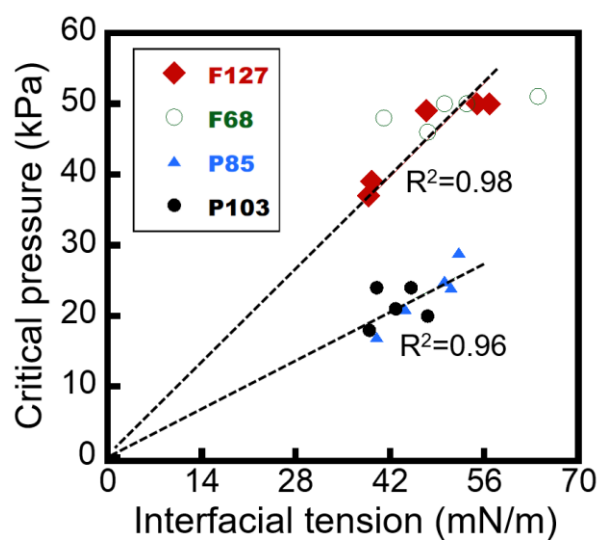

**Figure S5.** Relationship between the critical pressures and interfacial tensions. Dotted lines show the fitting lines based on eq 3 in the main text. Based on the catalogue-reported value of the membrane pore size,  $R_p = 1.0 \mu\text{m}$ ,  $\theta$  was estimated to be  $63^\circ$  for F127-F68 and  $75^\circ$  for P85-P103.



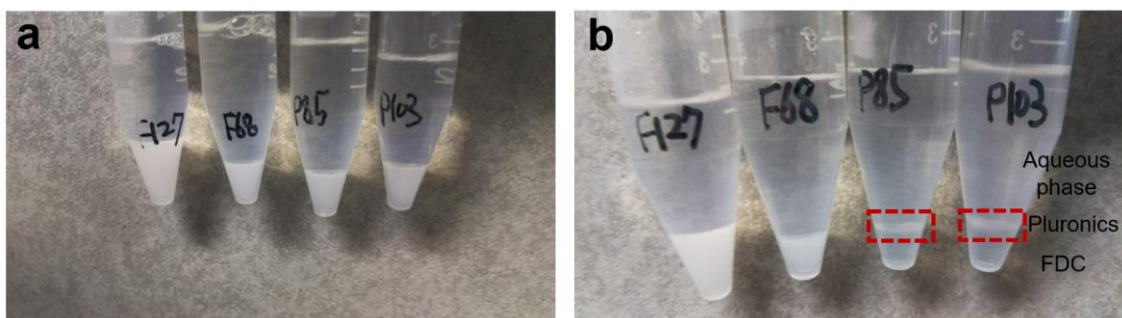

**Figure S6.** Pictures of emulsions with different Pluronics after preserving at (a) room temperature and (b) 4°C. Dashed rectangles indicate the phase-separated Pluronics phase.

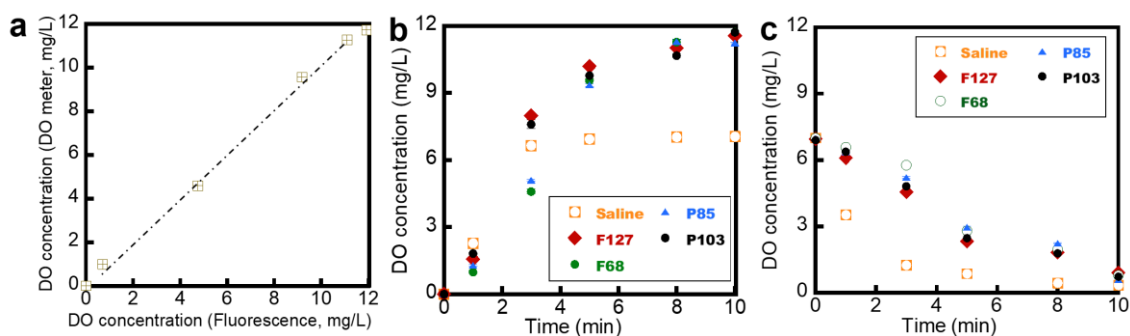

**Figure S7.** Oxygen loading and release curves measured via DO meter. (a) Correlation between oxygen concentrations measured by fluorescence from Ru(ddp)-loaded FDC emulsions and DO meter. (b) Oxygen loading: mediums were first deoxygenated by nitrogen and then oxygenated by air. (c) Oxygen release: mediums were first oxygenated by air and then deoxygenated by nitrogen. All the data were shown as average  $\pm$  standard deviation (N=3).

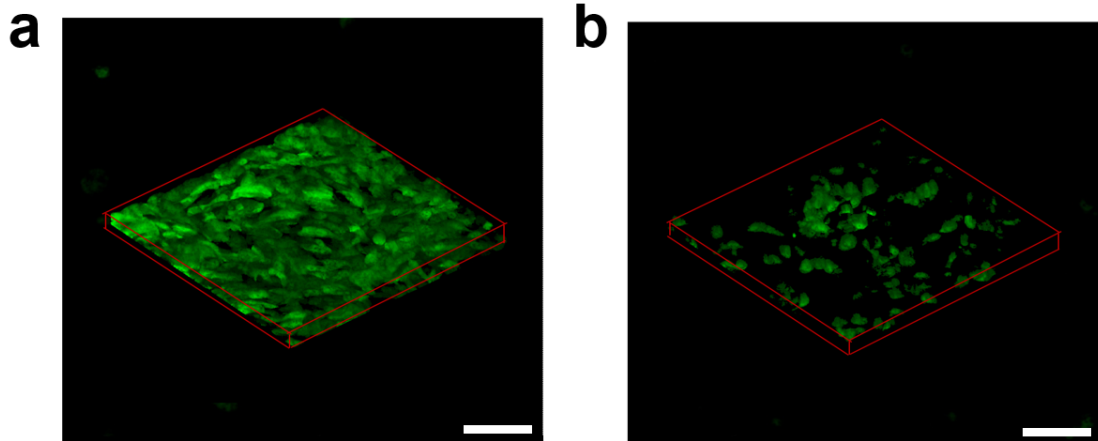

**Figure S8.** 3D-constructed confocal microscopic images of multilayer EGFP cells cultured (a) without and (b) with FDC emulsions under 2% O<sub>2</sub>. Scale bars: 50 μm
